# Supplementary material
Source: PubMed Central journal article supplement (PMC7737692)
Supplement: ccm-49-0102-s001.pdf [file ccm-49-0102-s001.pdf]

**eTable 1. Definitions of candidate prognostic factors**

| <b>Prognostic factor</b>                   | <b>Definition</b>                                                                                                                                                                                                                                                                                                                                                                                                                                                                                                                                                                                                                                                           |
|--------------------------------------------|-----------------------------------------------------------------------------------------------------------------------------------------------------------------------------------------------------------------------------------------------------------------------------------------------------------------------------------------------------------------------------------------------------------------------------------------------------------------------------------------------------------------------------------------------------------------------------------------------------------------------------------------------------------------------------|
| Age                                        | The age of the patient in whole years at admission to critical care.                                                                                                                                                                                                                                                                                                                                                                                                                                                                                                                                                                                                        |
| Sex                                        | The genotypical sex of the patient.                                                                                                                                                                                                                                                                                                                                                                                                                                                                                                                                                                                                                                         |
| Ethnicity                                  | The ethnicity of the patient based on self-report, as recorded in the medical records or as seen. Recorded according to NHS ethnic category codes and grouped as white, Asian, black or mixed/other.                                                                                                                                                                                                                                                                                                                                                                                                                                                                        |
| Quintile of deprivation                    | Population level quintiles within country based on small area multiple deprivation measures combining indicators of income, employment, education, health, crime, barriers to housing and services, and living environment. The latest published version of the measure for each country was used – the English Index of Multiple Deprivation 2019 for postcodes in England, the Welsh Index of Multiple Deprivation 2019 for postcodes in Wales or the Northern Ireland Multiple Deprivation Measure 2017 for postcodes in Northern Ireland.                                                                                                                               |
| Body mass index                            | Calculated from the weight (either measured or estimated) and height (either measured or estimated) of the patient as weight in kilograms divided by height in metres squared.                                                                                                                                                                                                                                                                                                                                                                                                                                                                                              |
| Any dependency prior to hospital admission | Dependency prior to admission to acute hospital, assessed as the best description for the dependency of the patient in the two weeks prior to admission to acute hospital and prior to the onset of the acute illness based on the level of assistance required with daily activities. Daily activities include bathing, dressing, going to the toilet, moving in/out of bed/chair, continence and eating.]                                                                                                                                                                                                                                                                 |
| Immunocompromise                           | Immunocompromise due to illness or treatment during the six months prior to admission to critical care, defined by one or more of: <ul style="list-style-type: none"> <li>• AIDS (HIV positive and AIDS-defining illness)</li> <li>• Congenital immunohumoral or cellular immune deficiency state</li> <li>• Metastatic disease (distant metastases)</li> <li>• Chronic myelogenous or lymphocytic leukaemia</li> <li>• Acute myelogenous or lymphocytic leukaemia or multiple myeloma</li> <li>• Lymphoma</li> <li>• Chemotherapy</li> <li>• Radiotherapy</li> <li>• Daily high dose steroid treatment (<math>\geq 0.3</math> mg/kg prednisolone or equivalent)</li> </ul> |
| Sedated for entire of first 24h            | The patient was, in clinical opinion, never free from the effects of sedative agents at any time during the first 24 hours following admission to critical care. Sedation is defined as receiving continuous or intermittent doses of agents to produce and maintain a continuous decreased level of consciousness.                                                                                                                                                                                                                                                                                                                                                         |
| Highest temperature                        | Highest central temperature during the first 24 hours following admission to critical care. If no central temperatures recorded, highest non-central temperature $+0.5^{\circ}\text{C}$ is substituted.                                                                                                                                                                                                                                                                                                                                                                                                                                                                     |
| Lowest systolic blood pressure             | Lowest systolic blood pressure during the first 24 hours following admission to critical care.                                                                                                                                                                                                                                                                                                                                                                                                                                                                                                                                                                              |
| Highest heart rate                         | Highest heart rate during the first 24 hours following admission to critical care.                                                                                                                                                                                                                                                                                                                                                                                                                                                                                                                                                                                          |
| Highest respiratory rate                   | Highest respiratory rate (either ventilated or non-ventilated) during the first 24 hours following admission to critical care.                                                                                                                                                                                                                                                                                                                                                                                                                                                                                                                                              |
| PaO <sub>2</sub> /FiO <sub>2</sub>         | Ratio of PaO <sub>2</sub> to FiO <sub>2</sub> from the arterial blood gas with the lowest PaO <sub>2</sub> from blood sampled during the first 24 hours following admission to critical care.                                                                                                                                                                                                                                                                                                                                                                                                                                                                               |

**eTable 1. Definitions of candidate prognostic factors**

| <b>Prognostic factor</b>            | <b>Definition</b>                                                                                                                                                                                                                                                                                   |
|-------------------------------------|-----------------------------------------------------------------------------------------------------------------------------------------------------------------------------------------------------------------------------------------------------------------------------------------------------|
| Mechanical ventilation              | Mechanical ventilation received at any time during the first 24 hours following admission to critical care. Mechanical defined as where some or all of the breaths, or a portion of the breaths, are delivered by a mechanical device. Indicated by the recording of a ventilated respiratory rate. |
| Highest blood lactate concentration | Highest blood lactate concentration during the first 24 hours following admission to critical care.                                                                                                                                                                                                 |
| Highest serum creatinine            | Highest serum creatinine during the first 24 hours following admission to critical care.                                                                                                                                                                                                            |
| Highest serum urea                  | Highest serum urea during the first 24 hours following admission to critical care.                                                                                                                                                                                                                  |
| Lowest hemoglobin concentration     | Lowest hemoglobin concentration during the first 24 hours following admission to critical care.                                                                                                                                                                                                     |
| Lowest platelet count               | Lowest platelet count during the first 24 hours following admission to critical care.                                                                                                                                                                                                               |
