# Supplementary material
Source: PubMed Central journal article supplement (PMC7737692)
Supplement: ccm-49-0102-s003.pdf [file ccm-49-0102-s003.pdf]

**eTable 3. Missing values and approach to imputation**

| <b>Prognostic factor</b>                   | <b>Missing values,<br/>n (%)</b> | <b>Imputation model</b>             |
|--------------------------------------------|----------------------------------|-------------------------------------|
| Age *                                      | 0 (0)                            | N/A                                 |
| Sex *                                      | 0 (0)                            | N/A                                 |
| Ethnicity                                  | 377 (3.8)                        | Multinomial logistic regression     |
| Quintile of deprivation                    | 723 (7.2)                        | Multinomial logistic regression     |
| Weight                                     | 318 (3.2)                        | Linear regression                   |
| Height                                     | 520 (5.2)                        | Linear regression                   |
| Any dependency prior to hospital admission | 129 (1.3)                        | Logistic regression                 |
| Immunocompromise                           | 108 (1.1)                        | Logistic regression                 |
| Sedated for entire of first 24h            | 6 (0.1)                          | Logistic regression                 |
| Highest temperature *                      | 0 (0)                            | N/A                                 |
| Lowest systolic blood pressure *           | 0 (0)                            | N/A                                 |
| Highest heart rate *                       | 0 (0)                            | N/A                                 |
| Highest respiratory rate *                 | 0 (0)                            | N/A                                 |
| PaO <sub>2</sub> /FiO <sub>2</sub>         | 484 (4.8)                        | Linear regression (log-transformed) |
| Mechanical ventilation †                   | 0 (0)                            | N/A                                 |
| Highest blood lactate concentration        | 475 (4.8)                        | Linear regression (log-transformed) |
| Highest serum creatinine                   | 370 (3.7)                        | Linear regression (log-transformed) |
| Highest serum urea                         | 427 (4.3)                        | Linear regression (log-transformed) |
| Lowest haemoglobin concentration           | 278 (2.8)                        | Linear regression                   |
| Lowest platelet count                      | 329 (3.3)                        | Linear regression (log-transformed) |

\* Patients with missing data excluded

† Derived from respiratory rates and therefore patients with missing data excluded
