# Supplementary material
Source: PubMed Central journal article supplement (PMC7737692)

**eFigure 2. Hazard ratios and 95% confidence intervals from Cox proportional hazards regression model for death within 30 days following start of critical care**

(A) age; (B) sex and ethnicity; (C) deprivation; (D) body mass index; (E) dependency, immunocompromise and sedation; (F) temperature; (G) systolic blood pressure; (H) heart rate; (I) respiratory rate; (J) PaO<sub>2</sub>/FiO<sub>2</sub> and ventilation; (K) blood lactate concentration; (L) serum creatinine; (M) serum urea; (N) hemoglobin concentration; and (O) platelet count

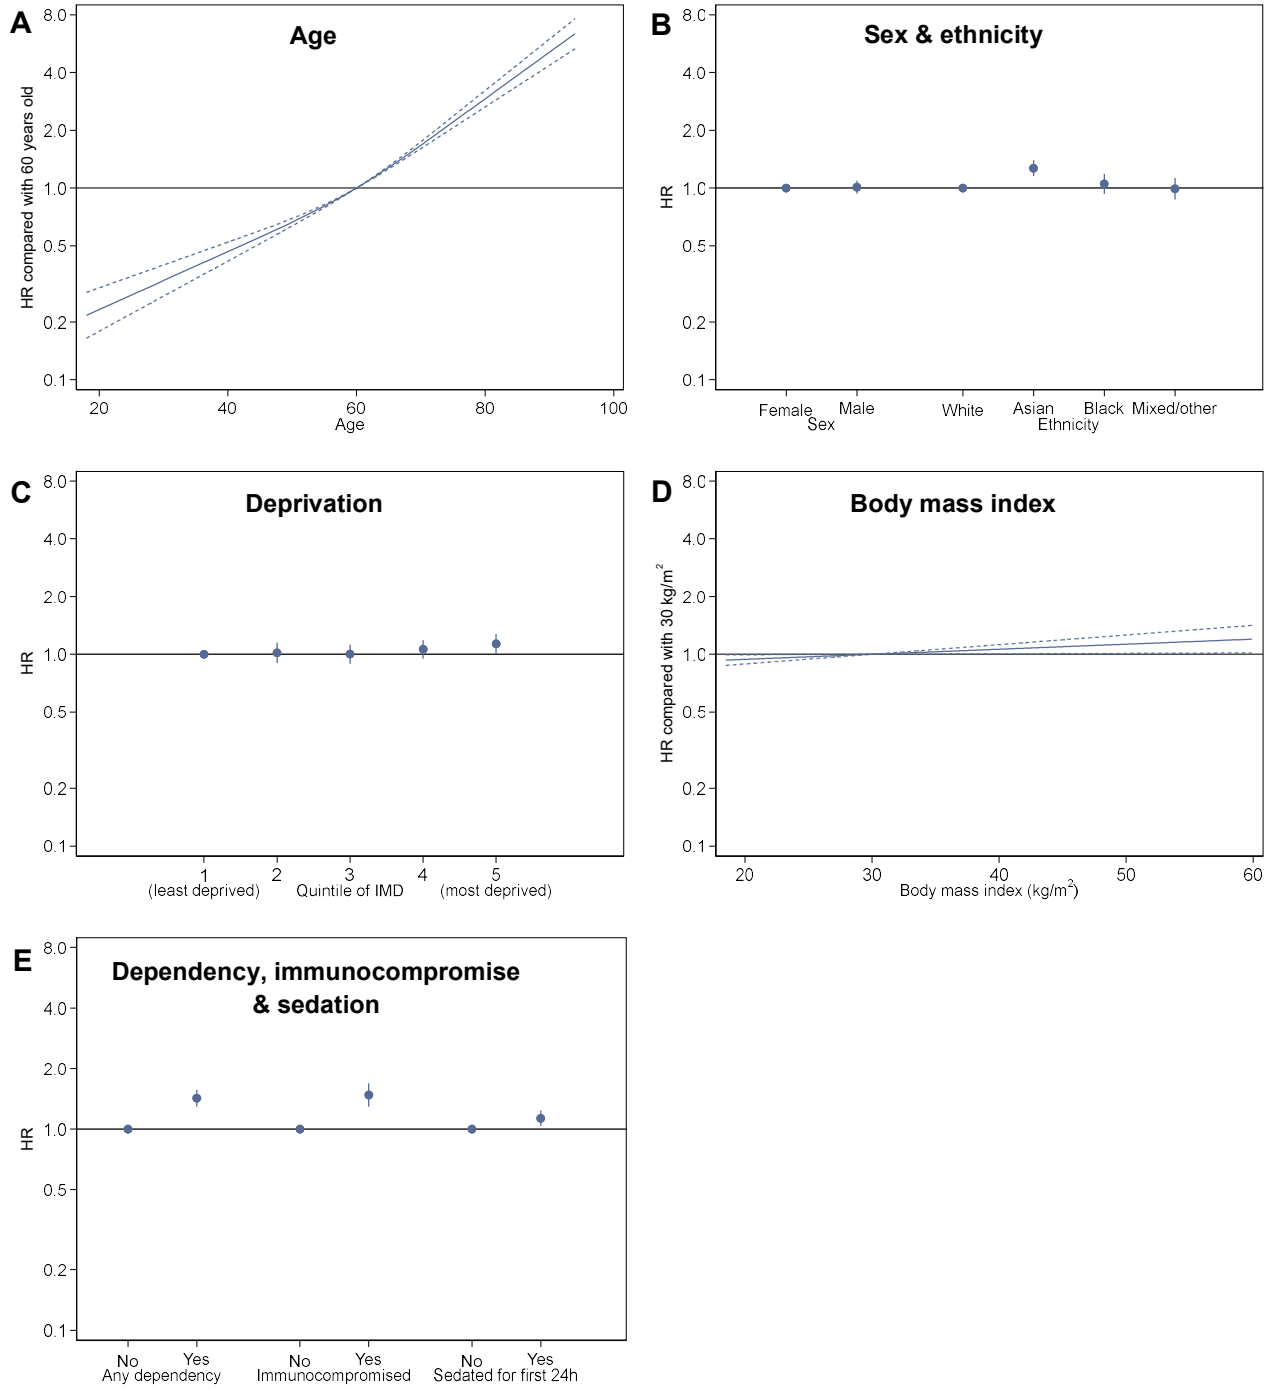

**eFigure 2. Hazard ratios and 95% confidence intervals from Cox proportional hazards regression model for death within 30 days following start of critical care**

(A) age; (B) sex and ethnicity; (C) deprivation; (D) body mass index; (E) dependency, immunocompromise and sedation; (F) temperature; (G) systolic blood pressure; (H) heart rate; (I) respiratory rate; (J) PaO<sub>2</sub>/FiO<sub>2</sub> and ventilation; (K) blood lactate concentration; (L) serum creatinine; (M) serum urea; (N) hemoglobin concentration; and (O) platelet count

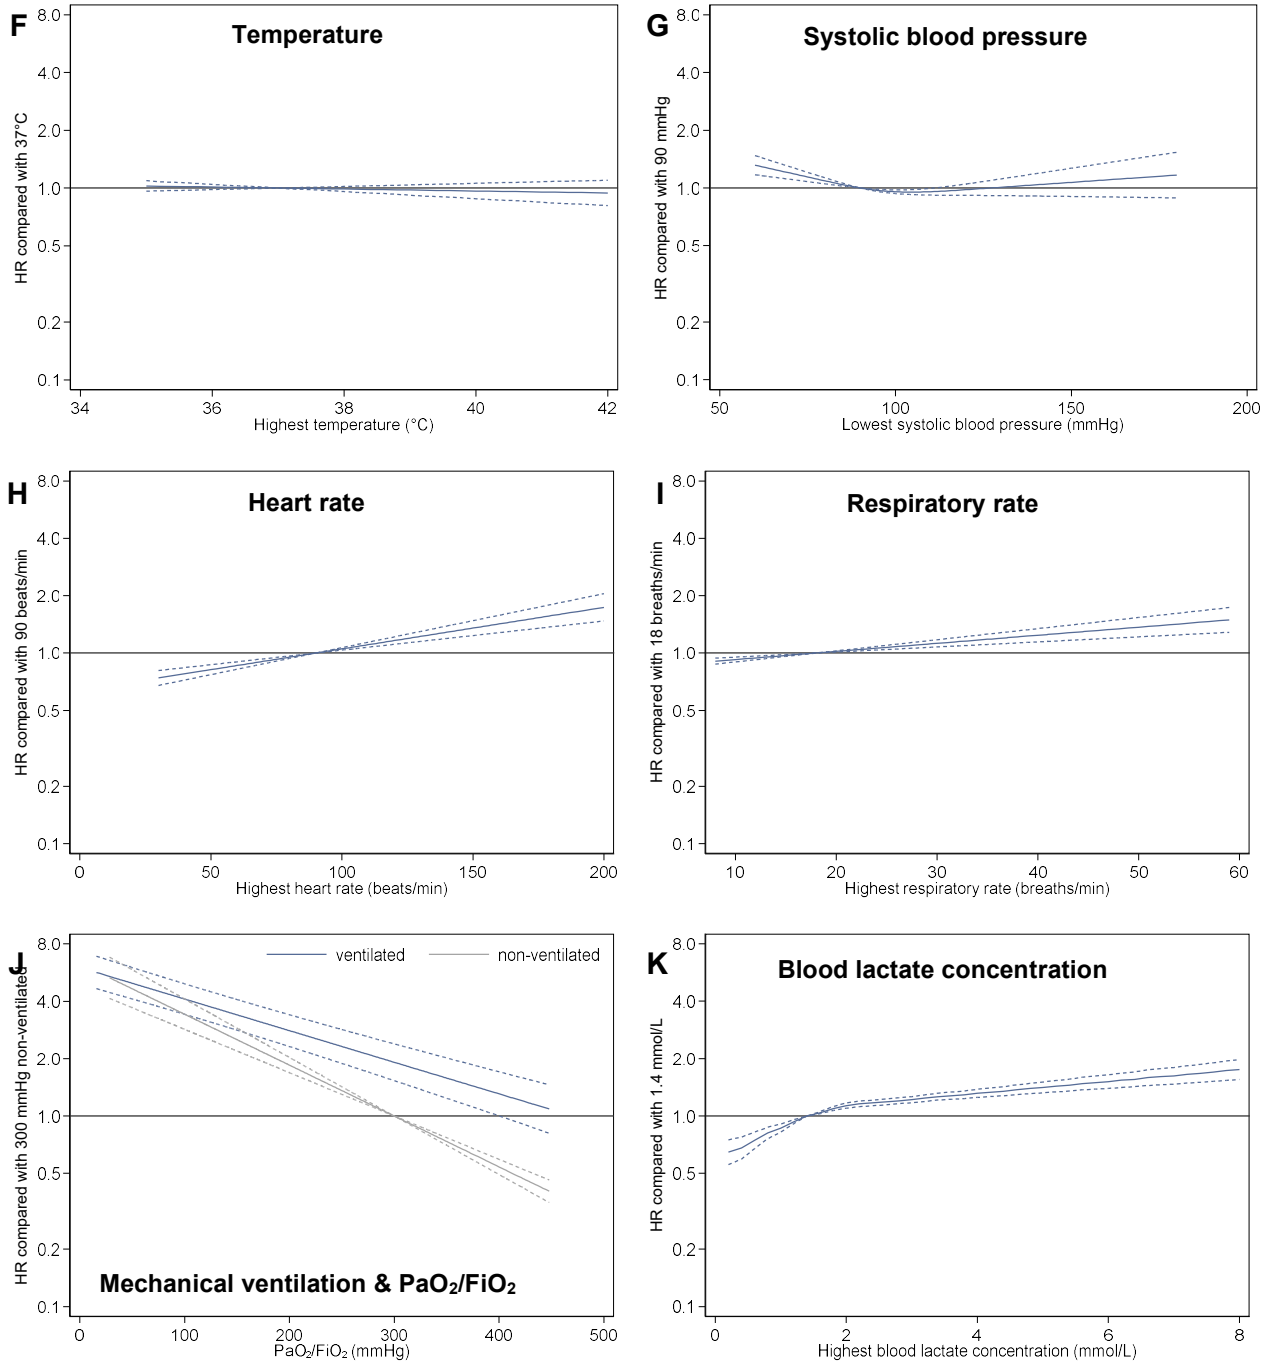

**eFigure 2. Hazard ratios and 95% confidence intervals from Cox proportional hazards regression model for death within 30 days following start of critical care**

(A) age; (B) sex and ethnicity; (C) deprivation; (D) body mass index; (E) dependency, immunocompromise and sedation; (F) temperature; (G) systolic blood pressure; (H) heart rate; (I) respiratory rate; (J) PaO<sub>2</sub>/FiO<sub>2</sub> and ventilation; (K) blood lactate concentration; (L) serum creatinine; (M) serum urea; (N) hemoglobin concentration; and (O) platelet count

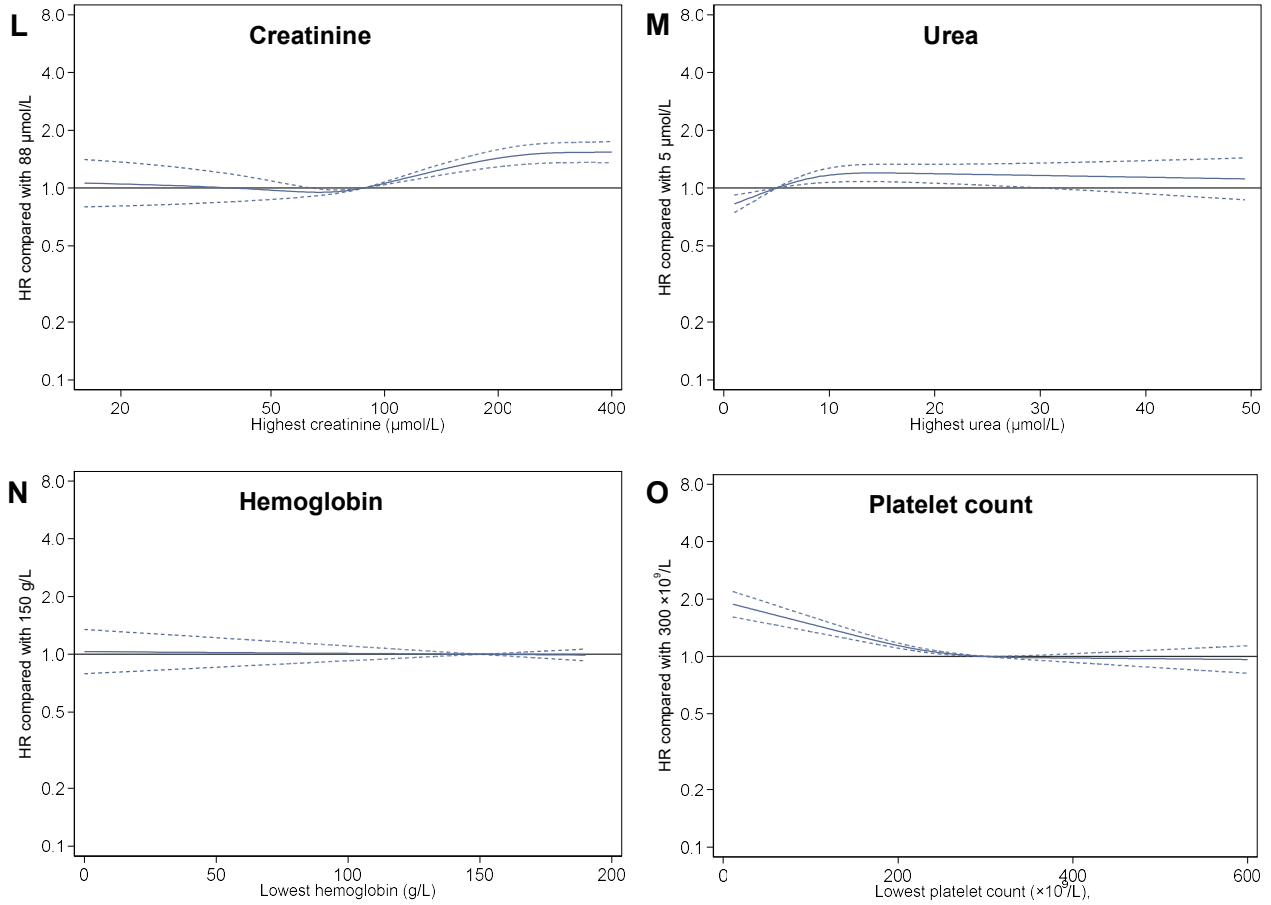

Supplement: ccm-49-0102-s005.pdf [file ccm-49-0102-s005.pdf]
