# Supplementary material
Source: PubMed Central journal article supplement (PMC7737692)
Supplement: ccm-49-0102-s006.pdf [file ccm-49-0102-s006.pdf]

**eTable 4. Multivariable Cox proportional hazards model for death within 30 days of start of critical care: complete case analysis (N=7,699)**

| Prognostic factor                                                                   | Hazard ratio (95% CI) | P value |
|-------------------------------------------------------------------------------------|-----------------------|---------|
| Age (years) – RCS (42,60,75)                                                        |                       | <0.0001 |
| Spline base variable 1                                                              | 1.036 (1.027, 1.045)  |         |
| Spline base variable 2                                                              | 1.012 (1.003, 1.02)   |         |
| Male sex (vs female)                                                                | 0.997 (0.909, 1.094)  | 0.951   |
| Ethnicity (vs white)                                                                |                       |         |
| Asian                                                                               | 1.309 (1.179, 1.453)  | <0.0001 |
| Black                                                                               | 1.032 (0.905, 1.177)  | 0.637   |
| Mixed/other                                                                         | 0.983 (0.853, 1.133)  | 0.817   |
| Quintile of deprivation (vs 1, least deprived)                                      |                       |         |
| 2                                                                                   | 1.026 (0.9, 1.169)    | 0.704   |
| 3                                                                                   | 0.99 (0.872, 1.123)   | 0.872   |
| 4                                                                                   | 1.05 (0.929, 1.187)   | 0.433   |
| 5 (most deprived)                                                                   | 1.104 (0.976, 1.247)  | 0.115   |
| Body mass index (per 5 kg/m <sup>2</sup> increase)                                  | 1.015 (0.984, 1.046)  | 0.346   |
| Any dependency prior to hospital admission                                          | 1.5 (1.339, 1.68)     | <0.0001 |
| Immunocompromise                                                                    | 1.482 (1.274, 1.723)  | <0.0001 |
| Sedated for entire of first 24h                                                     | 1.114 (1.009, 1.229)  | 0.033   |
| Highest temperature (per 1°C increase)                                              | 0.994 (0.959, 1.03)   | 0.747   |
| Lowest systolic blood pressure (mmHg)– RCS (78,95,121)                              |                       | 0.001   |
| Spline base variable 1                                                              | 0.991 (0.987, 0.996)  |         |
| Spline base variable 2                                                              | 1.009 (1.003, 1.015)  |         |
| Highest heart rate (per 10 beats/min increase)                                      | 1.045 (1.027, 1.064)  | <0.0001 |
| Highest respiratory rate (per 10 breaths/min increase)                              | 1.082 (1.037, 1.128)  | <0.0001 |
| PaO <sub>2</sub> /FiO <sub>2</sub> (per 50 mm Hg increase)                          | 0.69 (0.651, 0.732)   | <0.0001 |
| Mechanical ventilation (at PaO <sub>2</sub> /FiO <sub>2</sub> = 300 mm Hg)          | 2.314 (1.765, 3.034)  | <0.0001 |
| Mechanical ventilation × PaO <sub>2</sub> /FiO <sub>2</sub> (per 50 mm Hg increase) | 1.209 (1.129, 1.295)  | <0.0001 |
| Highest blood lactate concentration (mmol/L) – RCS (0.9,1.4,2.5)                    |                       | <0.0001 |
| Spline base variable 1                                                              | 1.575 (1.342, 1.848)  |         |
| Spline base variable 2                                                              | 0.662 (0.554, 0.791)  |         |
| Highest serum creatinine (µmol/L) – RCS (46,72,101,327)                             |                       | <0.0001 |
| Spline base variable 1                                                              | 0.998 (0.992, 1.004)  |         |
| Spline base variable 2                                                              | 1.128 (0.999, 1.274)  |         |
| Spline base variable 3                                                              | 0.783 (0.62, 0.99)    |         |
| Highest serum urea (mmol/L) – RCS (3.5,7.0,16.6)                                    |                       | 0.001   |
| Spline base variable 1                                                              | 1.058 (1.027, 1.089)  |         |
| Spline base variable 2                                                              | 0.931 (0.896, 0.968)  |         |
| Lowest haemoglobin concentration (per 10 g/L increase)                              | 0.994 (0.974, 1.014)  | 0.535   |
| Lowest platelet count (×10 <sup>9</sup> /L) – RCS (134,232,375)                     |                       | <0.0001 |
| Spline base variable 1                                                              | 0.997 (0.996, 0.998)  |         |
| Spline base variable 2                                                              | 1.002 (1.001, 1.003)  |         |

RCS ( $k_1, \dots, k_j$ ) indicates restricted cubic spline with knots at positions  $k_1$  to  $k_j$ , corresponding to the following base variables for prognostic factor  $x$ :

Spline base variable 1 =  $x$

Spline base variable  $i+1$  =  $[\max((x - k_i)^3, 0) - (k_j - k_i) \times \max((x - k_{j-1})^3, 0)] / (k_j - k_{j-1}) + (k_{j-1} - k_i) \times \max((x - k_j)^3, 0) / (k_j - k_{j-1}) / (k_j - k_i)^2$ ;  $i=1, \dots, j-2$
