# Supplementary material
Source: PubMed Central journal article supplement (PMC7737692)

**eFigure 1. Kaplan-Meier survival estimate to 30 days following start of critical care**

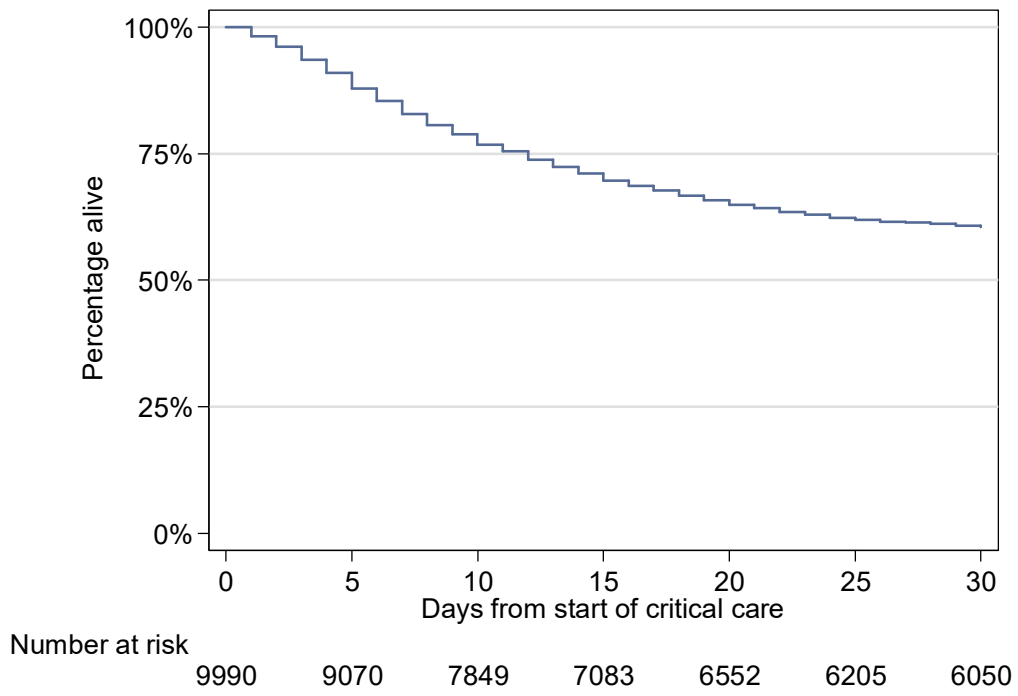

Supplement: ccm-49-0102-s004.pdf [file ccm-49-0102-s004.pdf]
